# Supplementary material for: Modified World Health Organization (WHO) Tunnel Test for Higher Throughput Evaluation of Insecticide-Treated Nets (ITNs) Considering the Effect of Alternative Hosts, Exposure Time, and Mosquito Density
Source: MDPI journal article supplement (doi:10.3390/insects13070562), 2022-06-21
Supplement: s1 [file s1]

## Supplementary material

### Tables

**Table S1.** Mean percentage mortality and 95% confidence interval (95% CI) for the negative control, Interceptor®G2, and Interceptor® at 24 hours post exposure (M24), mortality at 72 hours post exposure (M72), and blood feeding success (BFS) or blood feeding inhibition (BFI) of resistant *Anopheles arabiensis* with 12 hours of exposure time for rabbit, membrane and human arm; and 1 hour exposure time for membrane and human arm in the WHO tunnel test. The negative control thresholds for the WHO tunnel test are blood feeding success  $\geq 50\%$  and M24  $\leq 10\%$ .

| Assay                 | Blood feeding success    | Mortality          |                    |
|-----------------------|--------------------------|--------------------|--------------------|
|                       | % BFS (95%CI)            | % M24 (95%CI)      | % M72 (95%CI)      |
| <b>Control</b>        |                          |                    |                    |
| 12hr-Rabbit           | 64.8 (51.2 - 78.3)       | 3.8 (0.8 - 6.8)    | 7.7 (5.1 - 10.3)   |
| 12hr-Membrane         | 22.8 (10.4 - 35.1)       | 6.8 (5.9 - 7.6)    | 8.9 (8.3 - 9.5)    |
| 12hr-Human arm        | 74.4 (67.9 - 80.8)       | 6.4 (4.9 - 7.8)    | 11.7 (9.0 - 14.4)  |
| 1hr-Membrane          | 18.1 (12.5 - 23.6)       | 6.8 (5.0 - 8.7)    | 12.3 (9.1 - 15.4)  |
| 1hr-Human arm         | 65.5 (50.9 - 80.2)       | 7.2 (6.4 - 8.0)    | 9.4 (8.3 - 10.5)   |
| Treatment             | Blood feeding inhibition | Mortality          |                    |
|                       | % BFI (95%CI)            | % M24 (95%CI)      | % M72 (95%CI)      |
| <b>Interceptor®</b>   |                          |                    |                    |
| 12hr-Rabbit           | 93.4 (89.0 - 97.8)       | 58.1 (36.6 - 79.5) | 69.9 (50.5 - 89.2) |
| 12hr-Membrane         | 97.0 (94.3 - 99.7)       | 49.7 (34.9 - 64.6) | 65.6 (52.0 - 79.2) |
| 12hr-Human arm        | 52.8 (44.3 - 61.2)       | 35.2 (23.0 - 47.3) | 43.0 (29.9 - 56.0) |
| 1hr-Membrane          | 96.0 (93.3 - 98.7)       | 24.7 (17.0 - 32.4) | 38.9 (26.5 - 51.2) |
| 1hr-Human arm         | 58.2 (48.7 - 67.7)       | 20.3 (17.7 - 22.8) | 31.1 (26.1 - 36.1) |
| <b>Interceptor®G2</b> |                          |                    |                    |
| 12hr-Rabbit           | 86.5 (81.8 - 91.1)       | 41.3 (25.5 - 57.1) | 62.3 (51.2 - 73.5) |
| 12hr-Membrane         | 95.4 (92.3 - 98.5)       | 43.3 (26.3 - 60.3) | 68.8 (52.4 - 85.1) |
| 12hr-Human arm        | 44.1 (37.3 - 50.9)       | 23.4 (16.5 - 30.4) | 31.7 (24.0 - 39.4) |
| 1hr-Membrane          | 98.8 (97.7 - 99.9)       | 44.1 (21.4 - 66.8) | 55.8 (34.7 - 76.8) |
| 1hr-Human arm         | 53.8 (45.9 - 61.7)       | 11.4 (9.1 - 13.6)  | 22.3 (18.3 - 26.2) |

**Table S2.** Mean percentage mortality and 95% confidence interval (95% CI) for the negative control, susceptible *Anopheles gambiae* with Interceptor®, resistant *Anopheles arabiensis* with Interceptor®G2 at 24 hours post exposure (M24), mortality at 72 hours post exposure (M72) and blood feeding success (BFS) or blood feeding inhibition (BFI) with rabbit bait and a density of 50 or 100 mosquitoes in the WHO tunnel test. The negative control thresholds for the WHO tunnel test are blood feeding success  $\geq 50\%$  and M24  $\leq 10\%$ .

| Assay                                                      | Blood feeding success    | Mortality          |                     |
|------------------------------------------------------------|--------------------------|--------------------|---------------------|
|                                                            | % BFS (95%CI)            | % M24 (95%CI)      | % M72(95%CI)        |
| <b>Control</b>                                             |                          |                    |                     |
| 100-Mosquito                                               | 83.0 (73.6 - 92.4)       | 4.7 (3.1 - 6.3)    | 7.8 (6.2 - 9.4)     |
| 50-Mosquito                                                | 68.3 (56.3 - 80.3)       | 8.1 (3.5 - 12.8)   | 10.2 (7.2 - 13.1)   |
| Treatment                                                  | Blood feeding inhibition | Mortality          |                     |
|                                                            | % BFI (95%CI)            | % M24 (95%CI)      | % M72(95%CI)        |
| <b>Susceptible <i>An. gambiae</i> with Interceptor®</b>    |                          |                    |                     |
| <b>Overall</b>                                             |                          |                    |                     |
| 100- Mosquito                                              | 94.2 (91.8 - 96.6)       | 98.3 (97.5 - 99.1) | 99.1 (98.6 - 99.6)  |
| 50- Mosquito                                               | 90.9 (88.4 - 93.4)       | 98.4 (97.5 - 99.3) | 99.6 (99.3 - 99.9)  |
| <b>Unwashed</b>                                            |                          |                    |                     |
| 100- Mosquito                                              | 93.9 (89.7 - 98.0)       | 98.2 (96.9 - 99.5) | 99.1 (98.2 - 99.9)  |
| 50- Mosquito                                               | 90.4 (87.1 - 93.6)       | 98.9 (98.1 - 99.8) | 99.7 (99.4 - 100.1) |
| <b>Washed 20x</b>                                          |                          |                    |                     |
| 100- Mosquito                                              | 94.5 (91.9 - 97.2)       | 98.4 (97.6 - 99.3) | 99.2 (98.6 - 99.7)  |
| 50- Mosquito                                               | 91.4 (87.5 - 95.4)       | 97.9 (96.2 - 99.5) | 99.5 (99.0 - 99.9)  |
| <b>Resistant <i>An. arabiensis</i> with Interceptor®G2</b> |                          |                    |                     |
| <b>Overall</b>                                             |                          |                    |                     |
| 100- Mosquito                                              | 87.5 (84.0 - 91.1)       | 51.8 (41.9 - 61.7) | 73.9 (66.7 - 81.2)  |
| 50- Mosquito                                               | 81.7 (76.8 - 86.7)       | 45.1 (40.7 - 49.6) | 70.0 (67.0 - 73.1)  |
| <b>Unwashed</b>                                            |                          |                    |                     |
| 100- Mosquito                                              | 87.5 (82.2 - 92.7)       | 54.1 (40.3 - 67.9) | 74.1 (65.0 - 83.2)  |
| 50- Mosquito                                               | 82.4 (76.5 - 88.4)       | 45.8 (41.4 - 50.2) | 71.2 (67.8 - 74.7)  |
| <b>Washed 20x</b>                                          |                          |                    |                     |
| 100- Mosquito                                              | 87.6 (82.7 - 92.5)       | 49.6 (35.0 - 64.1) | 73.8 (62.2 - 85.3)  |
| 50- Mosquito                                               | 81.1 (73.0 - 89.1)       | 44.4 (36.5 - 52.3) | 68.8 (63.8 - 73.9)  |

**Table S3.** Mean percentage mortality and 95% confidence interval (95% CI) for the negative control, resistant *Anopheles arabiensis* with Interceptor® or Interceptor®G2 at 24 hours post exposure (M24), mortality at 72 hours post exposure (M72) and blood feeding success (BFS) or blood feeding inhibition (BFI) with rabbit bait and a density of 100 mosquitoes (rabbit-100) or membrane bait and a density of 50 mosquitoes (membrane-50) in the WHO tunnel test. The negative control thresholds for the WHO tunnel test are blood feeding success  $\geq 50\%$  and M24  $\leq 10\%$ .

| Assay                 | Blood feeding success    | Mortality          |                    |
|-----------------------|--------------------------|--------------------|--------------------|
|                       | % BFS (95%CI)            | % M24 (95%CI)      | % M72(95%CI)       |
| <b>Control</b>        |                          |                    |                    |
| 100-Rabbit            | 64.5 (54.8 - 74.2)       | 3.9 (1.8-6.1)      | 7.9 (6.0-9.7)      |
| 50-Membrane           | 25.9.1 (21.8 - 30.1.2)   | 8.7 (6.6-10.7)     | 14.6 (12.8-16.5)   |
| Treatment             | Blood feeding Inhibition | Mortality          |                    |
|                       | % BFI (95%CI)            | % M24 (95%CI)      | % M72(95%CI)       |
| <b>Interceptor®</b>   |                          |                    |                    |
| <b>Overall</b>        |                          |                    |                    |
| 100-Rabbit            | 98.3 (97.5 - 99.1)       | 56.4 (45.3 - 67.6) | 69.4 (60.0 - 76.6) |
| 50-Membrane           | 98.8 (98.3 - 99.2)       | 52.5 (45.6 - 59.4) | 73.0 (66.9 - 79.1) |
| <b>Unwashed</b>       |                          |                    |                    |
| 100-Rabbit            | 97.6 (96.1 - 99.0)       | 52.0 (41.8 - 62.2) | 65.5 (57.6 - 71.1) |
| 50-Membrane           | 98.6 (98.0 - 99.3)       | 45.8 (36.3 - 55.2) | 68.8 (58.5 - 79.1) |
| <b>Washed 20x</b>     |                          |                    |                    |
| 100-Rabbit            | 87.5 (84.0 - 91.1)       | 51.8 (41.9 - 61.7) | 68.9 (62.7 - 70.2) |
| 50-Membrane           | 98.9 (98.3 - 99.6)       | 59.3 (50.2 - 64.4) | 73.2 (66.1 - 76.3) |
| <b>Interceptor®G2</b> |                          |                    |                    |
| <b>Overall</b>        |                          |                    |                    |
| 100-Rabbit            | 81.7 (76.9 - 86.6)       | 45.1 (40.7 - 49.6) | 73.9 (66.7 - 81.1) |
| 50-Membrane           | 97.7 (96.8 - 98.7)       | 56.6 (50.0 - 63.1) | 82.5 (78.5 - 86.6) |
| <b>Unwashed</b>       |                          |                    |                    |
| 100-Rabbit            | 87.5 (82.2 - 92.7)       | 54.1 (40.3 - 67.9) | 74.1 (65.0 - 83.2) |
| 50-Membrane           | 96.8 (95.2 - 98.4)       | 52.1 (42.7 - 61.6) | 80.1 (73.0 - 87.1) |
| <b>Washed 20x</b>     |                          |                    |                    |
| 100-Rabbit            | 87.6 (82.7 - 92.5)       | 49.6 (35.0 - 64.1) | 73.8 (62.2 - 85.3) |
| 50-Membrane           | 98.7 (97.8 - 99.5)       | 61.0 (52.2 - 69.8) | 85.0 (81.0 - 89.0) |

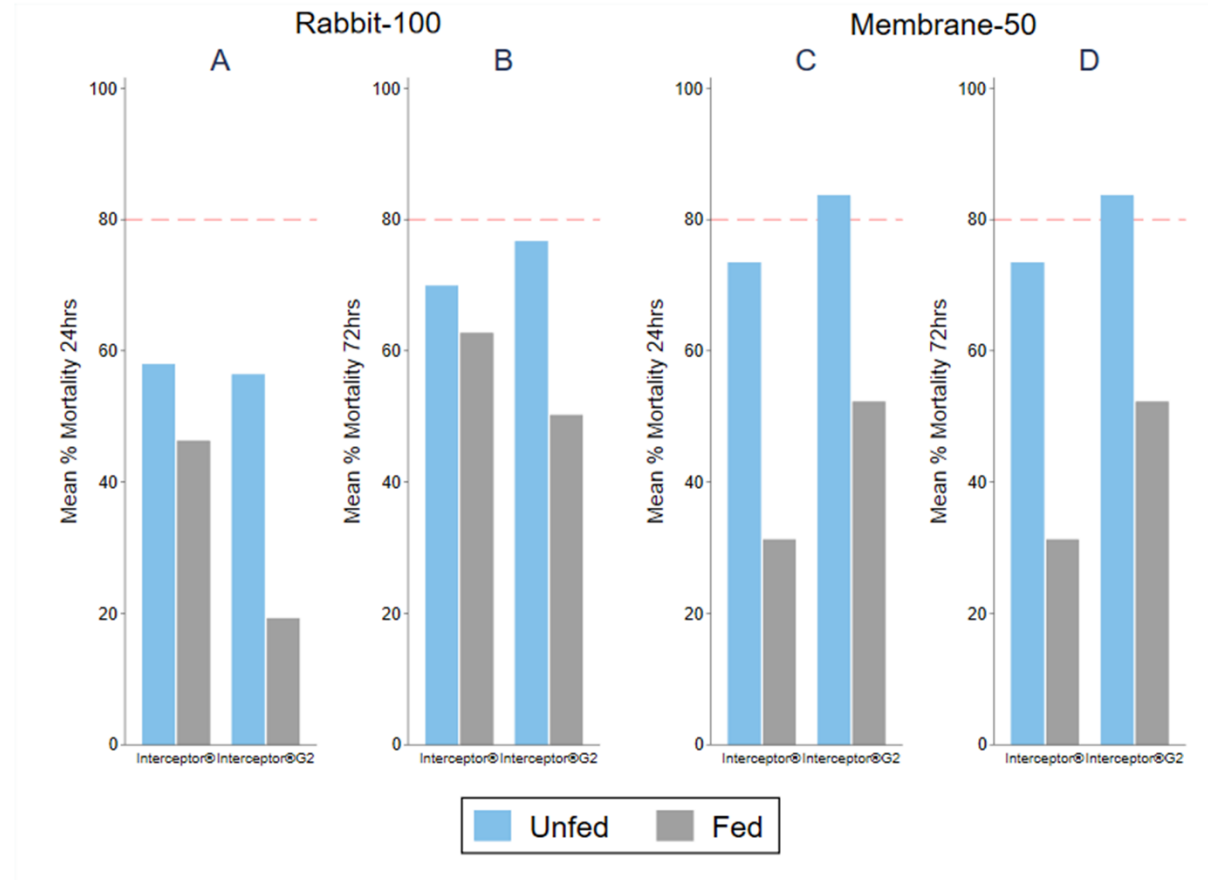

**Figure S1:** Mean percentage mortality at (A) 24-hours and (B) 72-hours with rabbit-100, (C) at 24-hours and (D) 72-hours with membrane-50, of blood fed and unfed resistant *Anopheles arabiensis* in the WHO tunnel test. Red dashed line depicts WHO mortality threshold of  $\geq 80\%$  mortality.

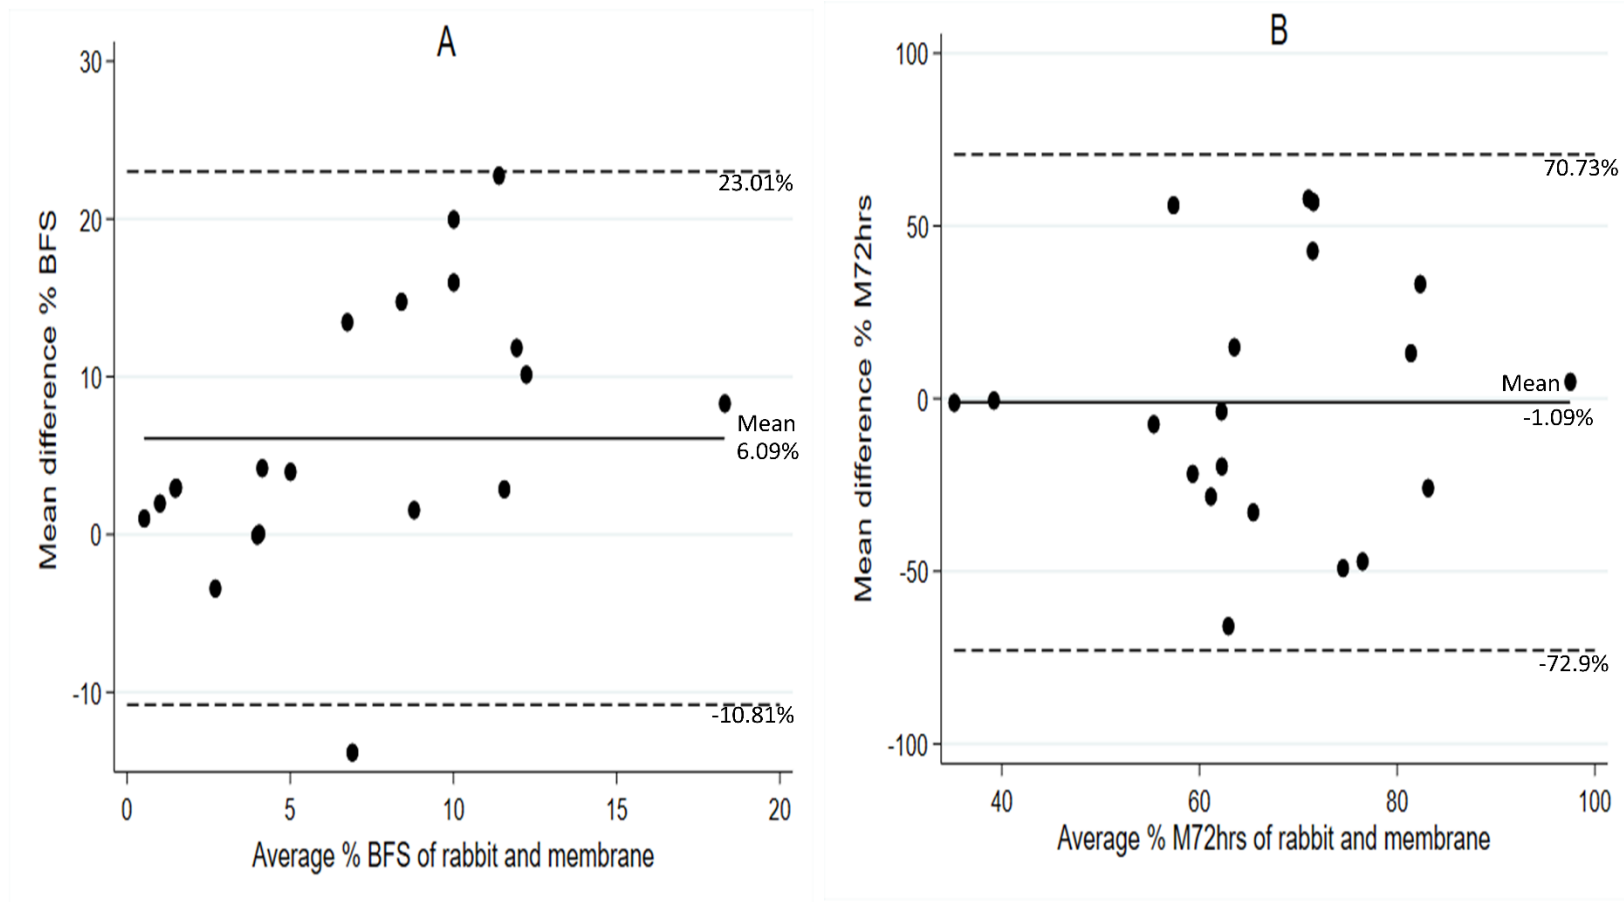

**Figure S2:** Bland and Altman plot of (A) blood feeding success (BFS) and (B) 72-hours mortality (M72) for Interceptor® and Interceptor®G2 with rabbit or membrane bait with a density of 100-pyrethroid resistant *Anopheles arabiensis* and 12-hour exposure time in the WHO tunnel test. The average value for both methods is plotted on the x-axis and the mean difference between methods on the y-axis. The solid line in the middle shows mean difference with 95% confidence interval of the mean difference represented by the dashed lines.

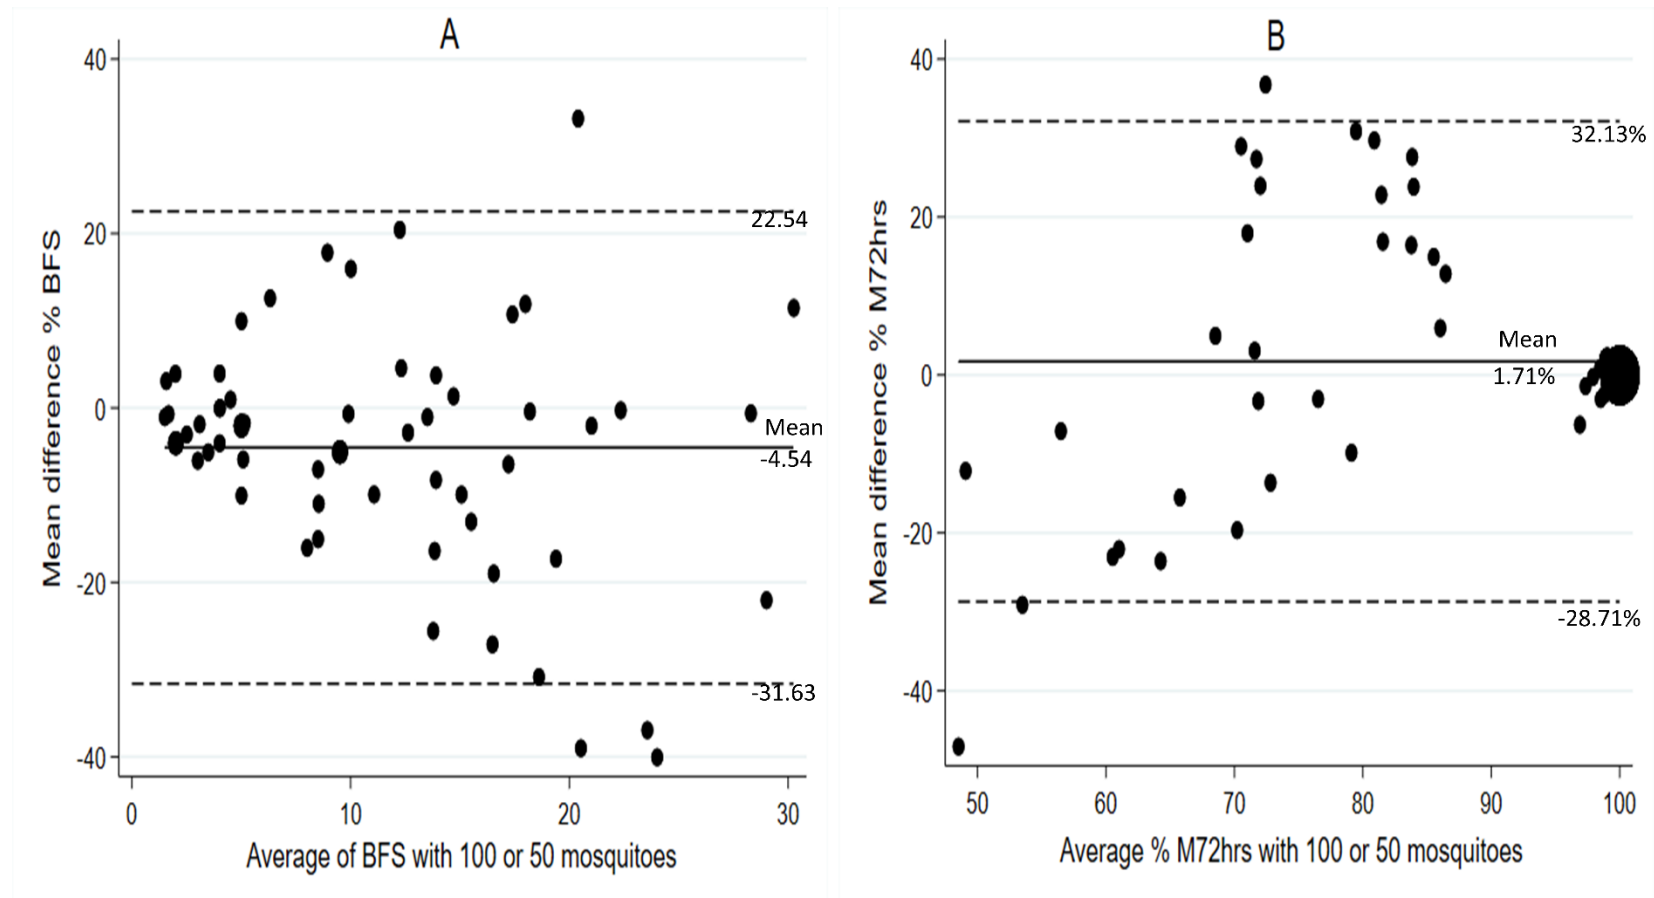

**Figure S3:** Bland and Altman plot of (A) blood feeding success (BFS) and (B) 72-hours mortality (M72) for Interceptor® with susceptible *Anopheles gambiae* and Interceptor®G2 with resistant *Anopheles arabiensis* using rabbit bait and a density of either 100 or 50 mosquitoes and a 12-hour exposure in the WHO tunnel test. The average value for both densities is plotted on the x-axis and the mean difference between densities on the y-axis. The solid line in the middle shows mean difference with 95% confidence interval of the mean difference represented by the dashed lines.

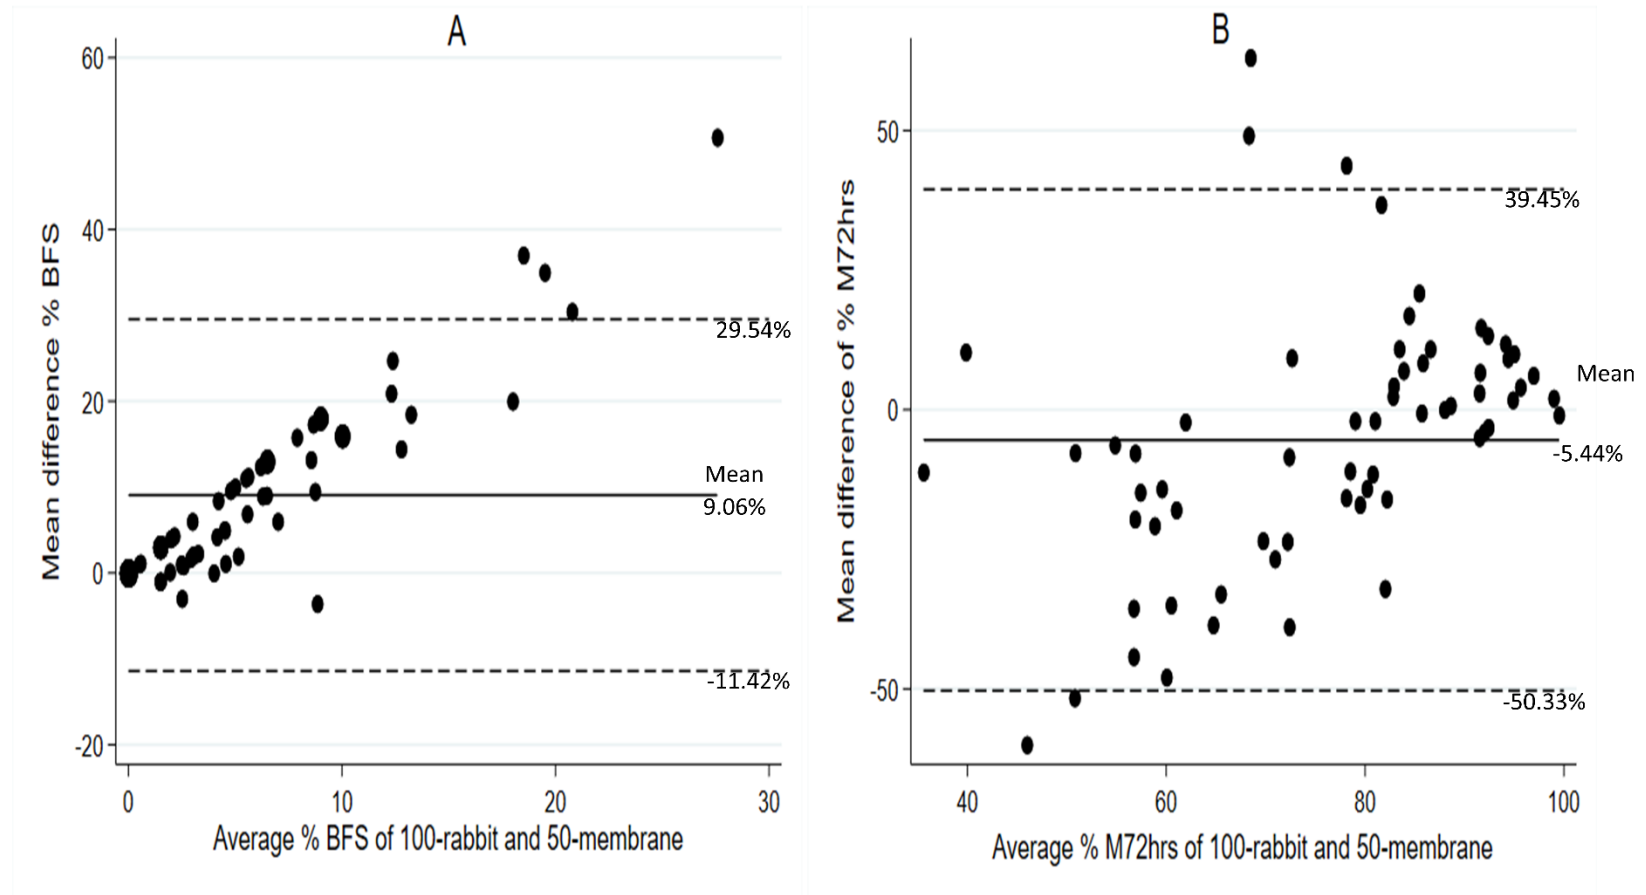

**Figure S4:** Figure S4: Bland and Altman plot of (A) blood feeding success (BFS) and (B) 72-hours mortality (M72) for Interceptor® and Interceptor®G2 with resistant *Anopheles arabiensis* using rabbit bait and a density of 100 mosquitoes or membrane bait and a density of 50 mosquitoes with a 12-hour exposure time in the WHO tunnel test. The average value for both densities is plotted on the x-axis and the mean difference between densities on the y-axis. The solid line in the middle shows mean difference with 95% confidence interval of the mean difference represented by the dashed lines.
